# Supplementary material for: Electrically Conductive Micropatterned Polyaniline-Poly(ethylene glycol) Composite Hydrogel
Source: MDPI journal article supplement (doi:10.3390/ma14020308), 2021-01-08
Supplement: s1 [file s1]

# Electrically conductive micropatterned polyaniline-poly(ethylene glycol) composite hydrogel

Soyoung Noh, Hye Yeon Gong, Hyun Jong Lee and Won-Gun Koh

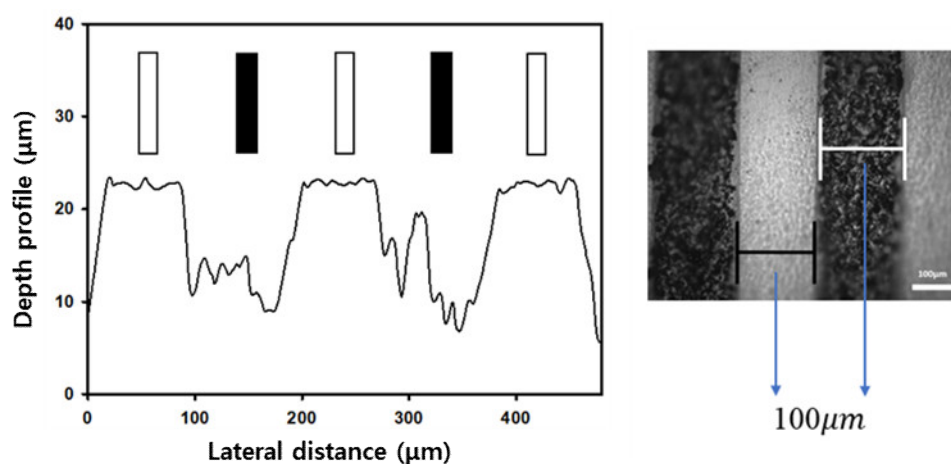

**Figure S1.** Graph line patterned substrate measured by surface profiler. The width and space of line patterns are 100  $\mu\text{m}$ .

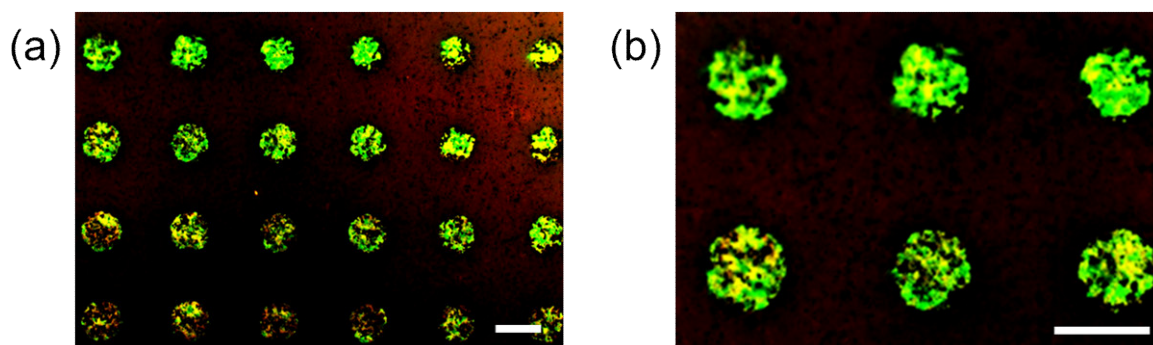

**Figure S2.** Fluorescence image of C2C12 cells on the 200  $\mu\text{m}$  circle-micropatterned, conductive hydrogel. Scale bars: 200  $\mu\text{m}$ .
